# Supplementary material for: CANCERTOOL: A Visualization and Representation Interface to Exploit Cancer Datasets
Source: Oxford University Press journal article supplement (doi:10.1158/0008-5472.can-18-1669), 2018-09-19
Supplement: 00085472can181669-sup-202788_2_supp_5007961_p7j7l5.xlsx [file 00085472can181669-sup-202788_2_supp_5007961_p7j7l5.xlsx]

## Sheet: Sheet1
		Supplementary Table 1. Databases available in the gene enrichment analysis
		Database	Address
		Biocarta	https://cgap.nci.nih.gov/Pathways/BioCarta_Pathways
		CMAP	https://clue.io/cmap
		HIPC	https://www.immuneprofiling.org/hipc/page/show?pg=home
		Cancer	http://software.broadinstitute.org/gsea/msigdb/genesets.jsp?collection=C6
		MIR	http://software.broadinstitute.org/gsea/msigdb/genesets.jsp?collection=MIR
		TFT	http://software.broadinstitute.org/gsea/msigdb/genesets.jsp?collection=TFT
		Disease Ontology	https://www.bioconductor.org/packages/3.7/bioc/vignettes/DOSE/inst/doc/DOSE.html
		Gene Ontology	http://www.geneontology.org/page/go-enrichment-analysis
		KEGG	http://www.pathway.jp/
		Reactome	http://www.reactome.org
		Pathway enrichment	http://pid.nci.nih.gov
